# Supplementary material
Source: Research Square preprint supplement (doi:10.21203/rs.3.rs-8429357/v1)
Supplement: Supplementary file 2 [file e6a2307dc9f9cae85fe0502e.xlsx]

## Sheet: Food production hotspots
Cluster ID	Exposure hotspot	Growing seasons	Number of countries	ISO 3 Codes	Countries	Continents	Area (Km^2)	Total harvested area (ha)	Crop classes diversity	Livestock units diversity	SPEI-6 slope 95th
15	Crop	1	5	BLR,LTU,RUS,EST,LVA	Belarus,Lithuania,Russia,Estonia,Latvia	Europe	82237.3	6003.72	1.7113	0.7767	0.0235
48	Crop	1	5	UKR,BLR,ROU,POL,MDA	Ukraine,Belarus,Romania,Poland,Moldova	Europe	144717	42027.2	1.7031	0.921	0.0227
33	Crop	1	4	FRA,DEU,BEL,NLD	France,Germany,Belgium,Netherlands	Europe	199343	51775.5	1.656	0.8192	0.024
124	Livestock	1	4	UZB,IRN,AFG,TKM	Uzbekistan,Iran,Afghanistan,Turkmenistan	Asia	169463	16091	1.369	1.0691	0.0234
270	Crop	1	4	GIN,CIV,MLI,BFA	Guinea,Ivory Coast,Mali,Burkina Faso	Africa	109662	14310.5	1.682	0.5581	0.033
289	Livestock	2	4	NGA,BEN,TGO,GHA	Nigeria,Benin,Togo,Ghana	Africa	47936.7	9087.67	1.6207	1.2206	0.0235
316	Crop	2	4	COG,COD,CAF,CMR	Republic of the Congo,Democratic Republic of the Congo,Central African Republic,Cameroon	Africa	58312.1	1775.58	1.7328	0.8752	0.0429
356	Crop & Livestock	1	4	TZA,COD,AGO,BDI	Tanzania,Democratic Republic of the Congo,Angola,Burundi	Africa	270356	10408.9	1.6735	1.2343	0.0262
43	Crop	1	3	UKR,BLR,RUS	Ukraine,Belarus,Russia	Europe	140149	35177.1	1.6765	0.8281	0.0308
171	Livestock	1	3	CHN,KOR,JPN	People's Republic of China,South Korea,Japan	Asia	223555	80899.6	1.6222	1.2091	0.0385
223	Crop	1	3	HTI,CUB,JAM	Haiti,Cuba,Jamaica	North America	75188.5	13181.5	1.6634	0.7614	0.0231
230	Crop & Livestock	2	3	VNM,LAO,THA	Vietnam,Laos,Thailand	Asia	31916.6	3160.07	1.8076	1.2022	0.027
261	Crop	1	3	GIN,MLI,SEN	Guinea,Mali,Senegal	Africa	101854	10843.6	1.6617	0.8359	0.0333
311	Crop	1	3	SSD,COD,CAF	South Sudan,Democratic Republic of the Congo,Central African Republic	Africa	85910.4	5522.34	1.6828	0.92	0.0331
323	Crop	2	3	SSD,KEN,UGA	South Sudan,Kenya,Uganda	Africa	71525.8	28984.4	1.781	0.6386	0.0422
42	Crop	1	2	KAZ,RUS	Kazakhstan,Russia	Asia,Europe	209728	38489.3	1.6299	0.6858	0.0283
50	Crop & Livestock	1	2	UKR,RUS	Ukraine,Russia	Europe	146278	65407.3	1.6832	1.0343	0.0247
64	Crop & Livestock	1	2	UKR,RUS	Ukraine,Russia	Europe	177237	73363.4	1.676	1.0562	0.0302
71	Livestock	1	2	CHN,MNG	People's Republic of China,Mongolia	Asia	120399	9888.42	1.1253	1.0563	0.024
166	Livestock	2	2	PAK,AFG	Pakistan,Afghanistan	Asia	30931	18999.5	1.1719	1.0557	0.0246
208	Crop & Livestock	2	2	CHN,MMR	People's Republic of China,Myanmar	Asia	32864.9	5686.41	1.6505	1.2465	0.0315
221	Livestock	2	2	CHN,MMR	People's Republic of China,Myanmar	Asia	38520.1	3270.63	1.5792	1.1836	0.0336
295	Livestock	2	2	NGA,CMR	Nigeria,Cameroon	Africa	34351.3	5557.21	1.567	1.0738	0.0253
310	Crop	1	2	COD,CAF	Democratic Republic of the Congo,Central African Republic	Africa	87337.2	3218.65	1.718	0.7029	0.0405
324	Crop	2	2	SOM,KEN	Somalia,Kenya	Africa	37671.2	2593.21	1.759	0.4329	0.0366
340	Crop	2	2	TZA,UGA	Tanzania,Uganda	Africa	30769.8	10321.1	1.7574	0.5491	0.0397
347	Crop	2	2	COG,GAB	Republic of the Congo,Gabon	Africa	34604.9	364.871	1.759	0.687	0.0379
352	Crop & Livestock	2	2	COG,COD	Republic of the Congo,Democratic Republic of the Congo	Africa	30740.1	845.95	1.7589	1.3319	0.049
385	Crop	1	2	BOL,BRA	Bolivia,Brazil	South America	129785	11438.4	1.6448	0.0976	0.0374
415	Crop	2	2	ARG,PRY	Argentina,Paraguay	South America	59780.2	456.213	1.6754	0.1588	0.0393
420	Crop	2	2	BRA,PRY	Brazil,Paraguay	South America	80413.5	48617.3	1.634	0.4666	0.0245
72	Livestock	1	1	CHN	People's Republic of China	Asia	125283	43041.6	1.4018	1.2269	0.0251
111	Livestock	1	1	CHN	People's Republic of China	Asia	107789	18436.2	1.5249	1.0808	0.0267
154	Livestock	1	1	CHN	People's Republic of China	Asia	149626	61661	1.586	1.1176	0.0333
164	Livestock	2	1	CHN	People's Republic of China	Asia	26280.9	21099.6	1.6023	1.2169	0.0289
167	Crop & Livestock	2	1	CHN	People's Republic of China	Asia	34830.8	32894.9	1.6465	1.1862	0.0326
169	Crop & Livestock	1	1	CHN	People's Republic of China	Asia	227448	92130.7	1.6653	1.2543	0.0354
173	Crop & Livestock	2	1	CHN	People's Republic of China	Asia	32664.1	23740.8	1.6384	1.1504	0.0324
174	Livestock	1	1	CHN	People's Republic of China	Asia	120734	48566.2	1.613	1.1352	0.0306
181	Crop & Livestock	2	1	CHN	People's Republic of China	Asia	34814.8	19681.8	1.6822	1.2423	0.0342
182	Livestock	1	1	CHN	People's Republic of China	Asia	75483.1	38689.5	1.5834	1.0645	0.035
183	Crop & Livestock	2	1	CHN	People's Republic of China	Asia	24167.4	7968.93	1.6991	1.0904	0.0373
185	Crop & Livestock	1	1	CHN	People's Republic of China	Asia	161132	61006.5	1.6748	1.1598	0.0343
202	Crop & Livestock	2	1	CHN	People's Republic of China	Asia	25667	3054.24	1.6517	1.098	0.0378
209	Crop & Livestock	2	1	CHN	People's Republic of China	Asia	27985.3	3572.93	1.6143	1.3514	0.0261
264	Crop	1	1	ETH	Ethiopia	Africa	100644	24924.7	1.6297	0.3025	0.028
317	Crop	2	1	SOM	Somalia	Africa	32988	732.935	1.7838	0.8262	0.0271
327	Crop & Livestock	2	1	COD	Democratic Republic of the Congo	Africa	30746.1	1449.31	1.7444	1.405	0.0579
334	Crop & Livestock	2	1	COD	Democratic Republic of the Congo	Africa	57688.5	620.159	1.6408	1.3566	0.059
355	Crop & Livestock	2	1	COD	Democratic Republic of the Congo	Africa	56055.8	1544.82	1.7173	1.0704	0.0524
360	Livestock	2	1	COD	Democratic Republic of the Congo	Africa	29922.8	1315.34	1.4646	1.5563	0.059
363	Crop & Livestock	2	1	COD	Democratic Republic of the Congo	Africa	29887.6	2507.08	1.6957	1.3124	0.0553
365	Crop & Livestock	2	1	COD	Democratic Republic of the Congo	Africa	32920.5	2976.93	1.6431	1.4816	0.053
386	Crop	2	1	BRA	Brazil	South America	27614.8	7316.67	1.6332	0.1879	0.0282

## Sheet: Economic value hotspots
Cluster ID	Exposure hotspot	Growing seasons	Number of countries	ISO 3 Codes	Countries	Continents	Area (Km^2)	Total harvested area (ha)	Total crop VoP	Total livestock units	SPEI-6 slope 95th
33	Crop & Livestock	1	4	FRA,DEU,BEL,NLD	France,Germany,Belgium,Netherlands	Europe	199343	51775.5	1.08091e+10	2.4119e+07	0.024
249	Livestock	1	4	ETH,SSD,SDZ,ERI	Ethiopia,South Sudan,Sudan,Eritrea	Africa	334467	67011.5	9.76773e+08	1.74775e+07	0.0309
428	Livestock	1	4	ARG,BRA,URY,PRY	Argentina,Brazil,Uruguay,Paraguay	South America	93457.5	11055.6	1.4367e+09	4.56812e+06	0.0257
171	Crop & Livestock	1	3	CHN,KOR,JPN	People's Republic of China,South Korea,Japan	Asia	223555	80899.6	1.75022e+10	1.91636e+07	0.0385
223	Livestock	1	3	HTI,CUB,JAM	Haiti,Cuba,Jamaica	North America	75188.5	13181.5	1.27398e+09	3.63107e+06	0.0231
323	Livestock	2	3	SSD,KEN,UGA	South Sudan,Kenya,Uganda	Africa	71525.8	28984.4	1.35684e+09	6.48397e+06	0.0422
432	Livestock	2	3	ARG,BRA,URY	Argentina,Brazil,Uruguay	South America	25474.3	2629.83	1.99895e+08	1.51089e+06	0.0266
438	Crop	1	3	ARG,BRA,URY	Argentina,Brazil,Uruguay	South America	207600	115525	8.50061e+09	1.1088e+07	0.0332
166	Livestock	2	2	PAK,AFG	Pakistan,Afghanistan	Asia	30931	18999.5	4.51138e+08	4.22336e+06	0.0246
275	Livestock	1	2	ECU,COL	Ecuador,Colombia	South America	47201.4	2656.18	3.09572e+08	3.7975e+06	0.0252
283	Livestock	1	2	COL,VEN	Colombia,Venezuela	South America	81545.8	6258.62	4.88429e+08	5.20108e+06	0.0325
288	Livestock	2	2	ETH,SOM	Ethiopia,Somaliland	Africa	27384.6	3544.89	1.39498e+08	2.49116e+06	0.0236
340	Crop & Livestock	2	2	TZA,UGA	Tanzania,Uganda	Africa	30769.8	10321.1	7.47023e+08	2.16366e+06	0.0397
385	Livestock	1	2	BOL,BRA	Bolivia,Brazil	South America	129785	11438.4	8.05799e+08	7.10348e+06	0.0374
412	Livestock	1	2	BRA,PRY	Brazil,Paraguay	South America	51203.9	8824.67	5.35584e+08	2.89548e+06	0.0363
413	Livestock	2	2	BRA,PRY	Brazil,Paraguay	South America	30655.4	9244.76	5.83312e+08	1.68678e+06	0.0326
420	Crop & Livestock	2	2	BRA,PRY	Brazil,Paraguay	South America	80413.5	48617.3	3.39724e+09	5.28605e+06	0.0245
437	Livestock	2	2	ARG,URY	Argentina,Uruguay	South America	24897.4	8531.66	5.55032e+08	1.81001e+06	0.0312
111	Crop	1	1	CHN	People's Republic of China	Asia	107789	18436.2	3.90215e+09	2.81766e+06	0.0267
154	Crop & Livestock	1	1	CHN	People's Republic of China	Asia	149626	61661	1.17699e+10	1.0167e+07	0.0333
158	Crop & Livestock	1	1	CHN	People's Republic of China	Asia	87126.3	26095.8	6.00055e+09	5.70552e+06	0.0248
164	Crop & Livestock	2	1	CHN	People's Republic of China	Asia	26280.9	21099.6	4.04057e+09	3.69964e+06	0.0289
167	Crop & Livestock	2	1	CHN	People's Republic of China	Asia	34830.8	32894.9	4.87094e+09	9.97399e+06	0.0326
169	Crop & Livestock	1	1	CHN	People's Republic of China	Asia	227448	92130.7	2.03019e+10	1.86156e+07	0.0354
173	Crop & Livestock	2	1	CHN	People's Republic of China	Asia	32664.1	23740.8	5.26966e+09	3.85813e+06	0.0324
174	Crop & Livestock	1	1	CHN	People's Republic of China	Asia	120734	48566.2	9.58037e+09	1.52613e+07	0.0306
181	Crop & Livestock	2	1	CHN	People's Republic of China	Asia	34814.8	19681.8	4.17402e+09	2.96708e+06	0.0342
182	Crop & Livestock	1	1	CHN	People's Republic of China	Asia	75483.1	38689.5	7.75232e+09	1.0997e+07	0.035
183	Crop & Livestock	2	1	CHN	People's Republic of China	Asia	24167.4	7968.93	2.35668e+09	1.37739e+06	0.0373
185	Crop & Livestock	1	1	CHN	People's Republic of China	Asia	161132	61006.5	1.5634e+10	1.25024e+07	0.0343
202	Crop & Livestock	2	1	CHN	People's Republic of China	Asia	25667	3054.24	6.37444e+08	2.24037e+06	0.0378
209	Livestock	2	1	CHN	People's Republic of China	Asia	27985.3	3572.93	6.63184e+08	1.89469e+06	0.0261
264	Livestock	1	1	ETH	Ethiopia	Africa	100644	24924.7	9.08346e+08	8.37763e+06	0.028
282	Livestock	2	1	COL	Colombia	South America	43350.8	3211.33	3.82564e+08	3.88678e+06	0.0268
391	Livestock	1	1	BRA	Brazil	South America	202180	17351.1	1.6785e+09	1.18658e+07	0.0325
404	Crop & Livestock	1	1	BRA	Brazil	South America	191835	61288	5.92205e+09	1.25039e+07	0.0233
429	Crop	2	1	ARG	Argentina	South America	29173	13475.2	1.03909e+09	923969	0.0357
449	Crop & Livestock	2	1	ARG	Argentina	South America	22647.2	12611.4	6.82794e+08	1.29068e+06	0.0311
453	Livestock	2	1	ARG	Argentina	South America	38263.5	8968.45	4.90948e+08	2.47392e+06	0.0249
